# Supplementary material for: Science during lockdown – from virtual seminars to sustainable online communities
Source: Oxford University Press journal article supplement (doi:10.1242/jcs.249607), 2020-08-01
Supplement: jcs249607supp.pdf [file jcs249607supp.pdf]

Table S1. Online seminar series in numbers.

[Click here to Download Table S1](#)
